# Supplementary material
Source: PubMed Central journal article supplement (PMC6288386)
Supplement: develop-145-168351-s1.pdf [file develop-145-168351-s1.pdf]

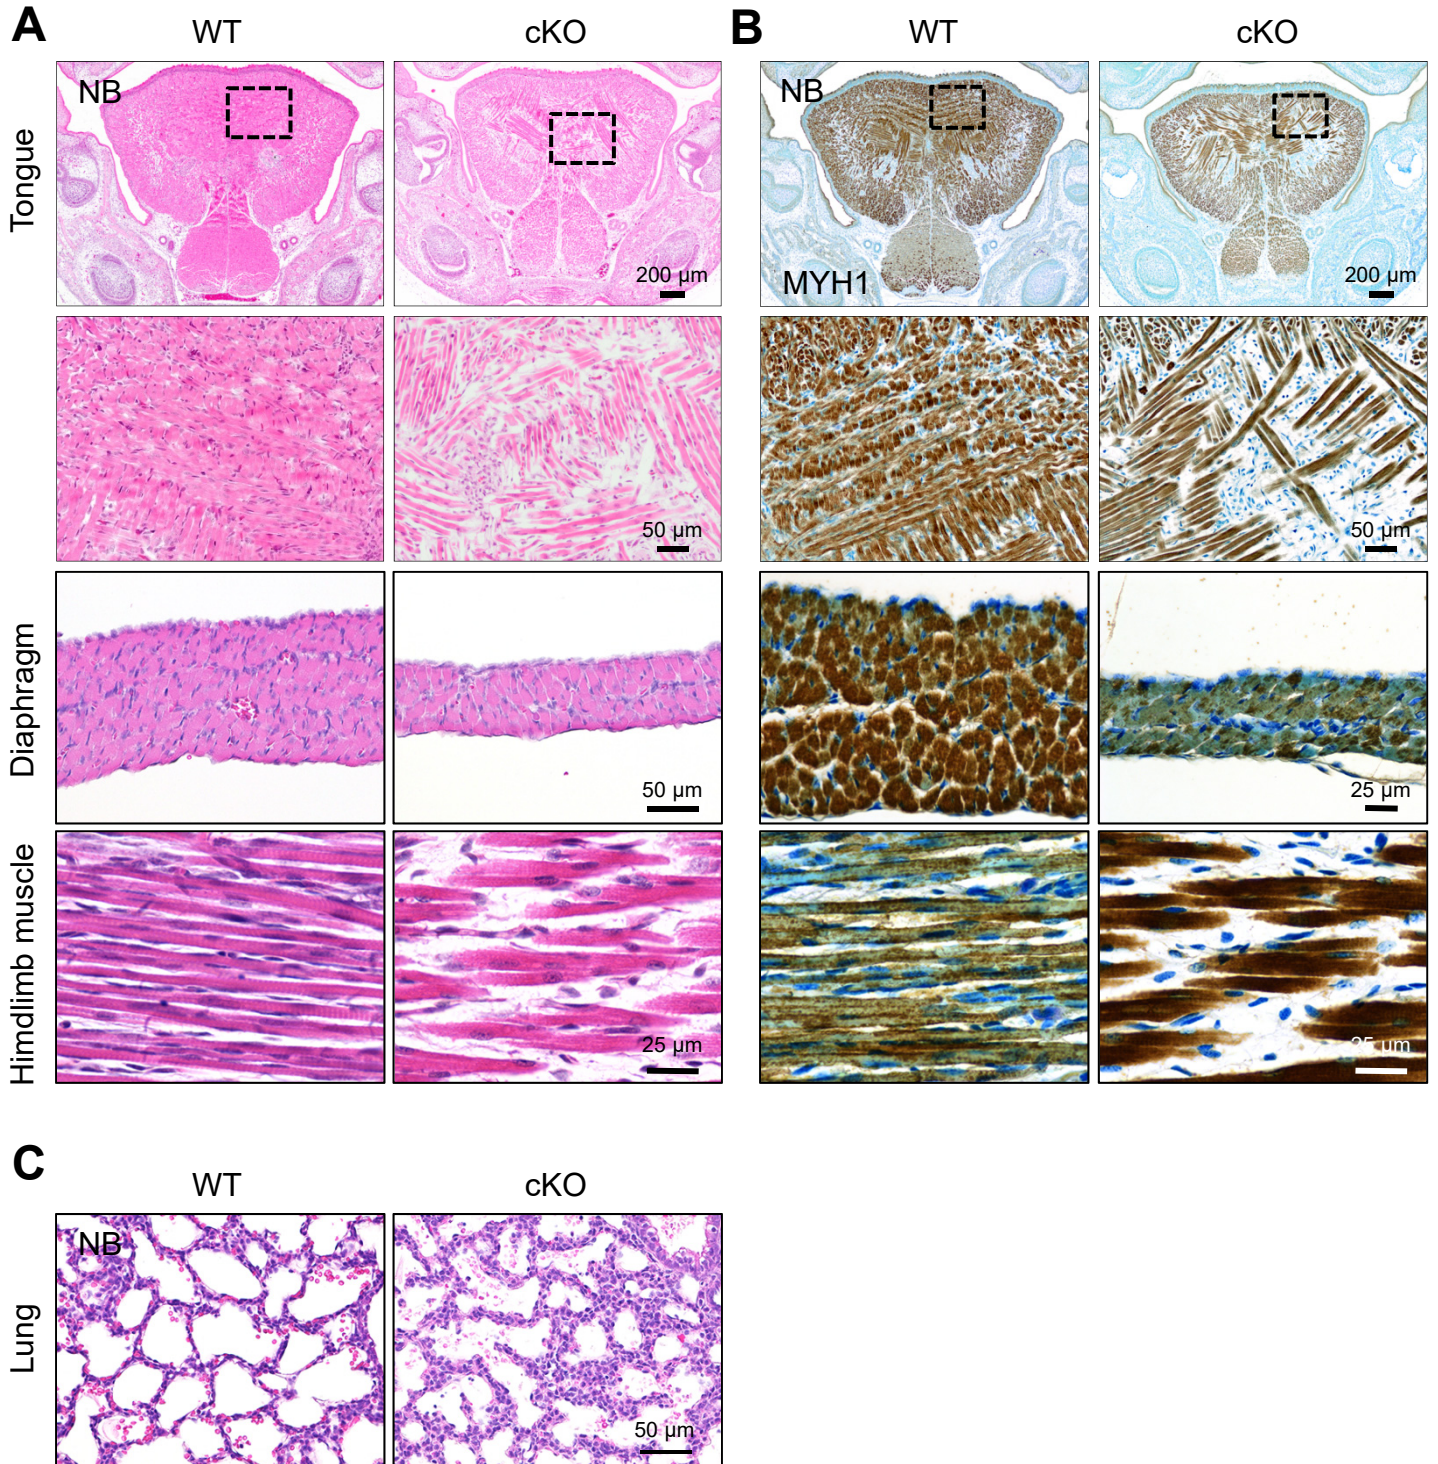

**Figure S1. Muscle developmental and lung maturation defects in mice with ablation of *Ctnnb1* in the *Myog-Cre*-expressing cell population.** (A) H&E staining of tongue, diaphragm, and hindlimb muscles of newborn (NB) wild-type (WT) and conditional null (cKO) mice. 2<sup>nd</sup> row is magnification of square in the 1<sup>st</sup> row. (B) Immunohistochemical staining for MYH1 (Brown) in newborn WT and cKO mice. The nuclei were counterstained with Methylene blue. (C) H&E staining of lungs from NB WT and cKO mice. Scale bars: 200, 50, and 25  $\mu\text{m}$  as indicated in each image.

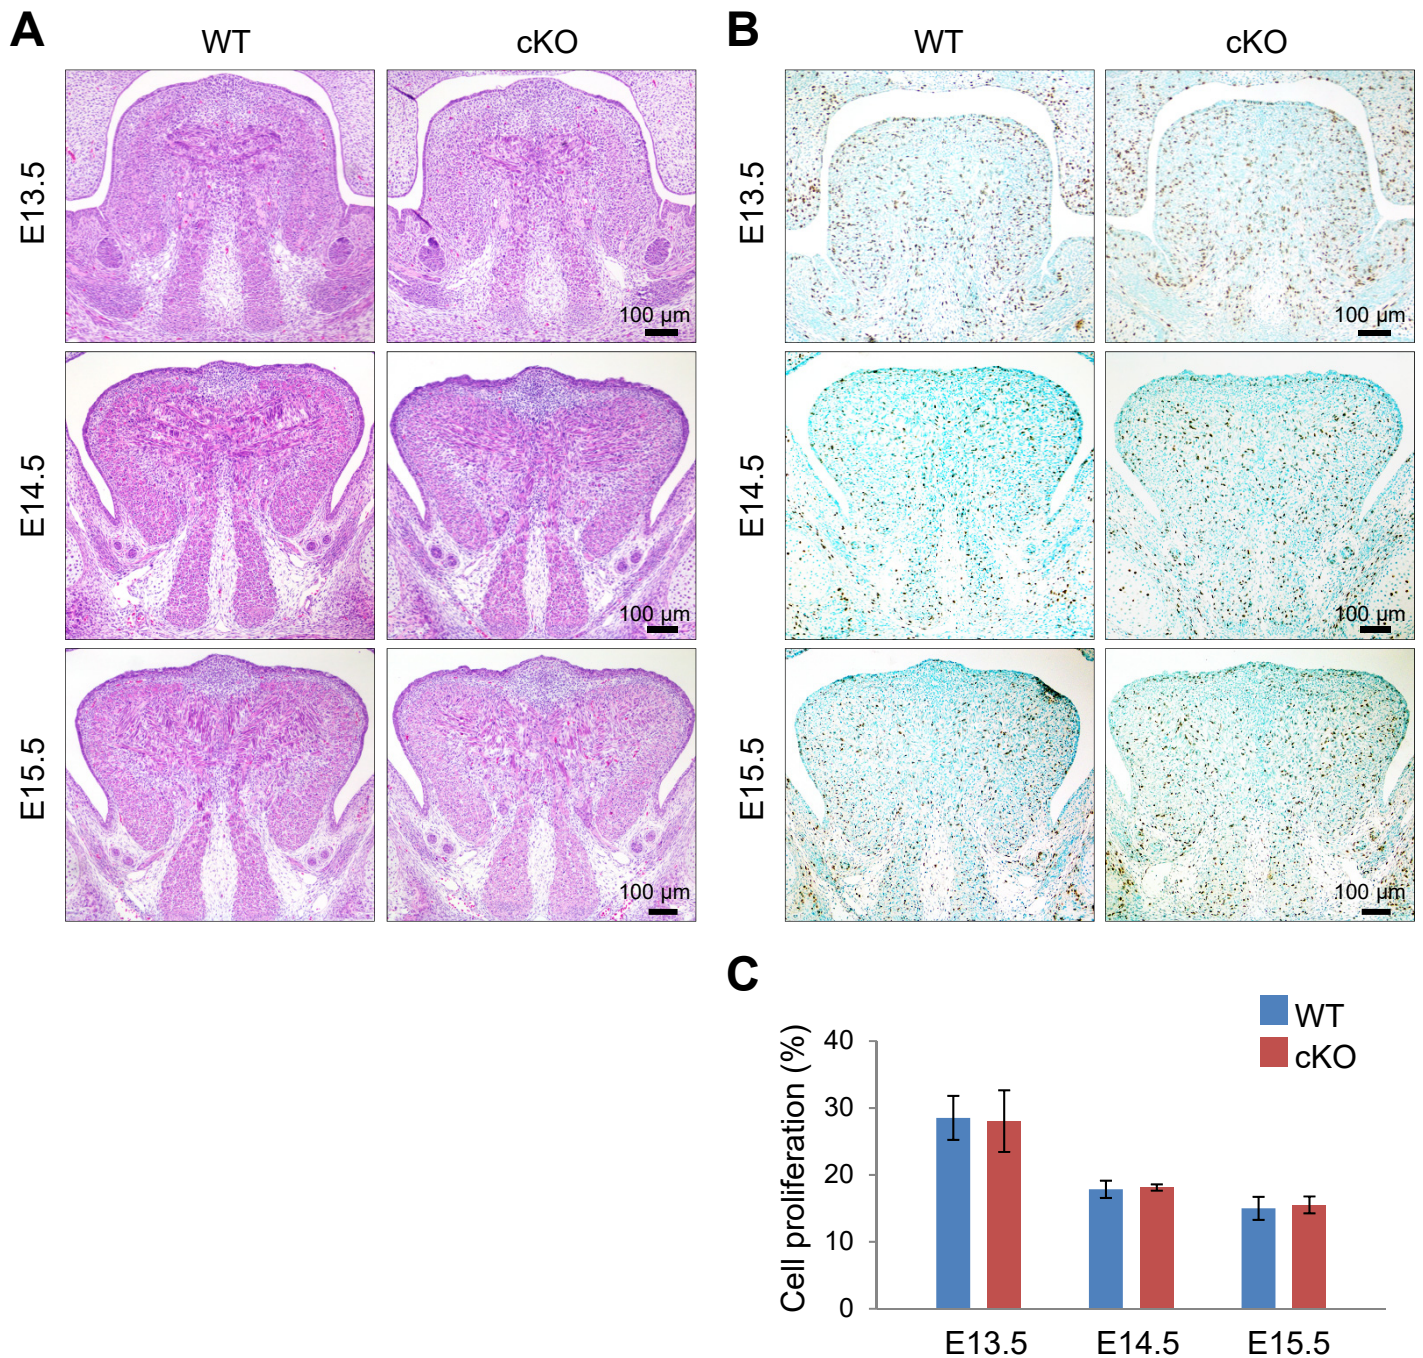

**Figure S2. No cell proliferation defects are observed in mice with ablation of *Ctnnb1* in the *Myog-Cre*-expressing cell population.** (A) H&E staining of wild-type (WT) and conditional null (cKO) embryos at E13.5, E14.5, and E15.5. Scale bars: 100  $\mu$ m. (B) BrdU staining of WT and cKO embryos at E13.5, E14.5, and E15.5. BrdU-positive cells are brown. Nuclei were counterstained with Methylene blue. Scale bars: 100  $\mu$ m. (C) Quantification of cell proliferation activity in the tongues from WT (blue bars) and cKO (red bars) embryos at E13.5, E14.5, and E15.5.

**A**

Control (*Ctnnb1*<sup>F/+</sup>; *ZsGreen*<sup>ckI/ckI</sup>; *Myog-Cre*)

Day 0

Day 3

Day 7

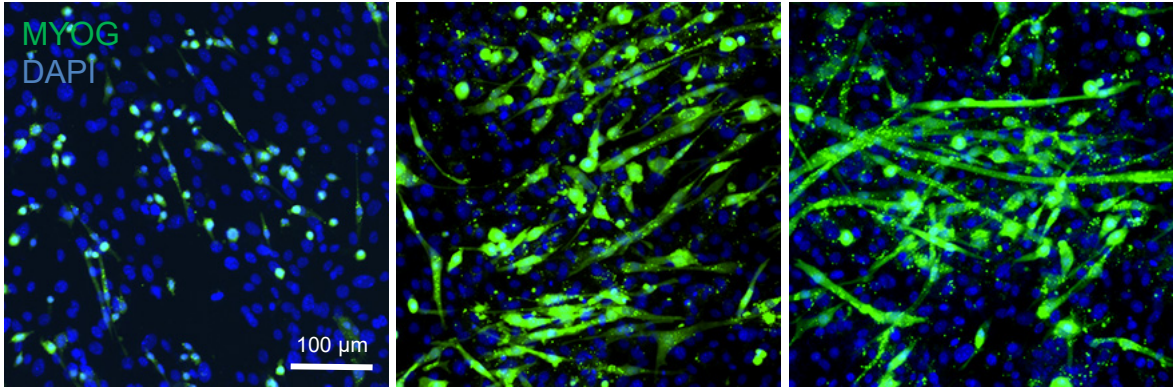

cKO (*Ctnnb1*<sup>F/F</sup>; *ZsGreen*<sup>ckI/ckI</sup>; *Myog-Cre*)

Day 0

Day 3

Day 7

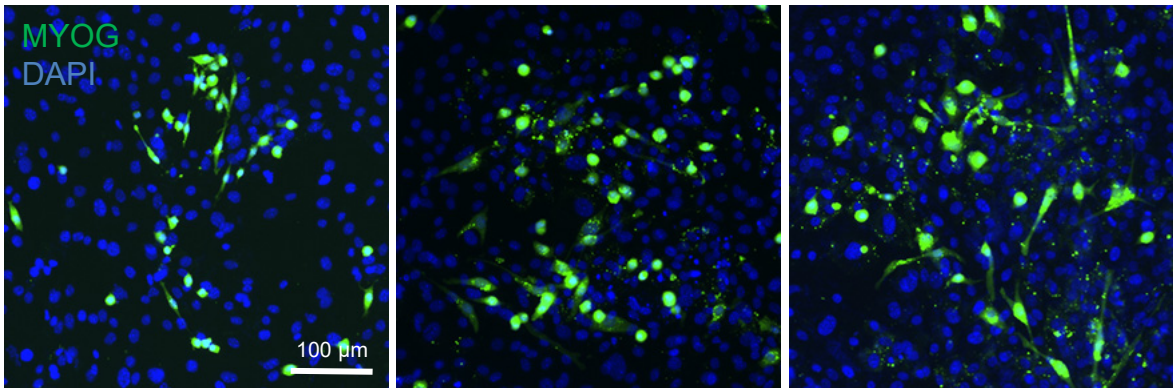

**B**

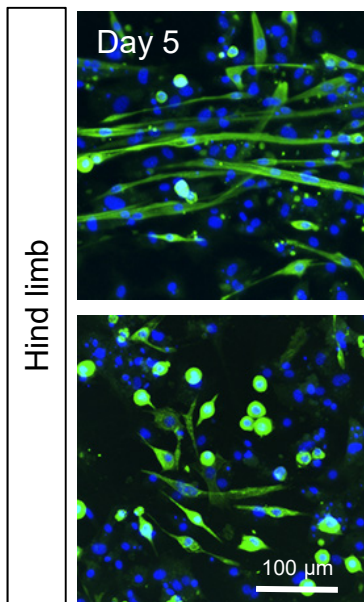

Day 5

Hind limb

Control (*Ctnnb1*<sup>F/+</sup>; *ZsGreen*<sup>ckI/ckI</sup>; *Myog-Cre*)

cKO (*Ctnnb1*<sup>F/F</sup>; *ZsGreen*<sup>ckI/ckI</sup>; *Myog-Cre*)

MYOG/DAPI

**Figure S3. Compromised muscle differentiation in *Ctnnb1*<sup>F/F</sup>;Myog-Cre myoblasts.** (A) Muscle differentiation assay at the indicated day of culture of cells extracted from *Ctnnb1*<sup>F/+</sup>;ZsGreen<sup>cKI/cKI</sup>;Myog-Cre control and *Ctnnb1*<sup>F/F</sup>;ZsGreen<sup>cKI/cKI</sup>;Myog-Cre conditional knockout (cKO) tongues. (B) Muscle differentiation assay at Day 5 of culture of cells extracted from *Ctnnb1*<sup>F/+</sup>;ZsGreen<sup>cKI/cKI</sup>;Myog-Cre wild-type (WT) control and *Ctnnb1*<sup>F/F</sup>;ZsGreen<sup>cKI/cKI</sup>;Myog-Cre cKO hindlimbs. Myogenin-expressing myoblasts are green. Nuclei were counterstained with DAPI (blue). Scale bars: 100 μm.

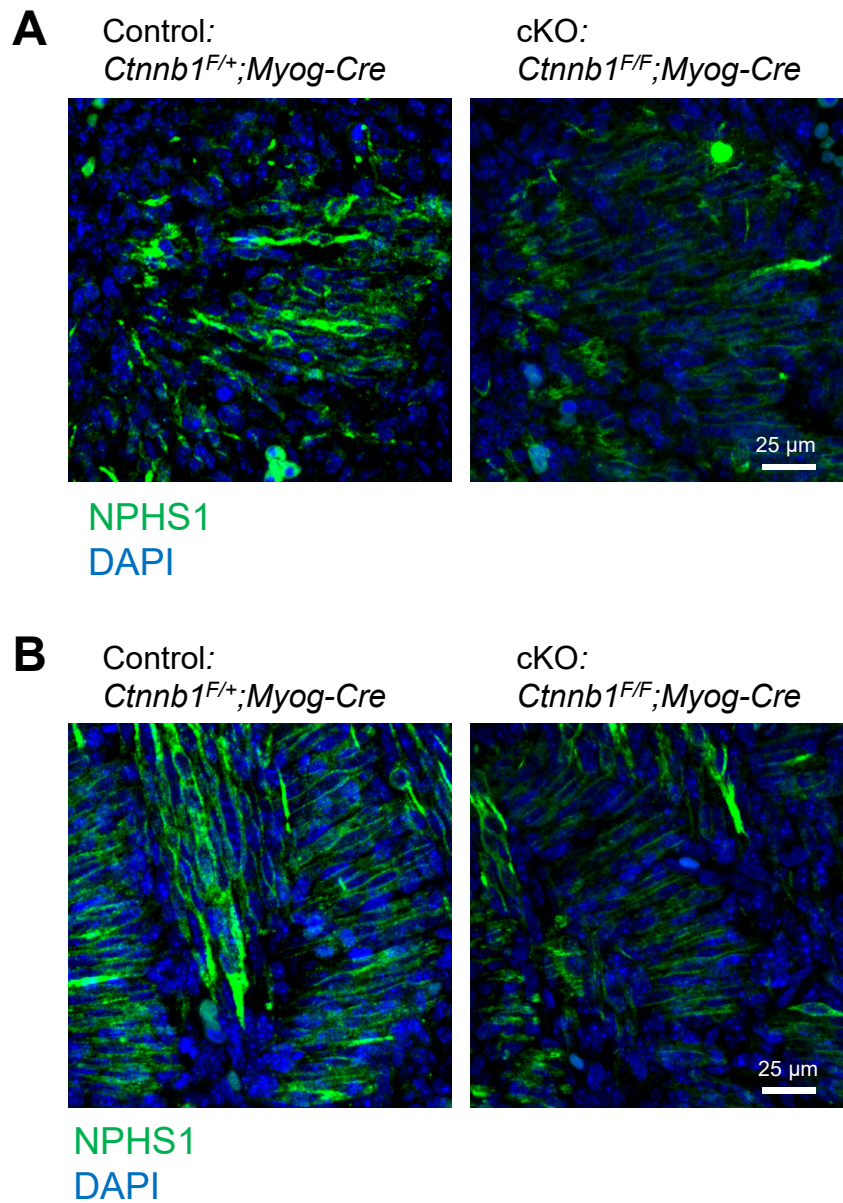

**Figure S4. Suppressed NPHS1 expression in *Ctnnb1*<sup>F/F</sup>;Myog-Cre tongue.** (A) NPHS1 immunostaining of tongues from *Ctnnb1*<sup>F/+</sup>;Myog-Cre control and *Ctnnb1*<sup>F/F</sup>;Myog-Cre conditional knockout (cKO) mice at E13.5. (B) NPHS1 immunostaining of tongues from *Ctnnb1*<sup>F/+</sup>;Myog-Cre control and *Ctnnb1*<sup>F/F</sup>;Myog-Cre cKO mice at E14.5. *Nphs1*-expressing myoblasts are green. Nuclei were counterstained with DAPI (blue). Scale bars: 25 µm

|            |                       |                                         |                                            |                               |
|------------|-----------------------|-----------------------------------------|--------------------------------------------|-------------------------------|
| Mouse      | AATCGCATCTCTT         | CAAAG                                   | GCAATTAGTTTAA                              | AACTCAGGATTCCCAAAGATTGTCAGGAG |
| Rat        | AATCACACCTCTT         | CAAAG                                   | GCAATTATTTTAA                              | AACTCAGGATTCCCAAATATTCTTGGGAG |
| Dog        | --TTACCCGAGCCCAA---   | CAATT                                   | -TTCCAAATTTGAAAACGTCAAACA-----             | GAACC                         |
| Horse      | -ATGGGTCATCCTCAA----- | AGAAGCTAAAAATTCAGGACTCCCAAATGTTTACTTGAG |                                            |                               |
| Chimpanzee | -GTGGGTCACCCC         | CAAAG                                   | --AAGCAGCTCAAAAATCAGGACTCCTAAATGTTTACCCGAG |                               |
| Orangutan  | -ATGGGTCACCCC         | CAAAG                                   | --AAGCAGCTCAAAAATCAGGACTCCTAAATGTTTACCCGAG |                               |
| Human      | -GTGGGTCACCCC         | CAAAG                                   | --AAGCAGCTCAAAAATCAGGACTCCTAAATGTTTACCCGAG |                               |
| Macaque    | -ATGGGTCACCCC         | CAAAG                                   | --AAGCAGCTCAAAAATCAGGACTCCTAAATGTTTACCCAAG |                               |
|            | *                     | ***                                     | *                                          | *** * * * * * ***             |

**Figure S5. Conserved  $\beta$ -catenin binding site in the promoter region of *Nephs1*.** Conserved  $\beta$ -catenin binding sites are highlighted in yellow. \* The sequence is conserved in all eight species.
